# Supplementary material
Source: PubMed Central journal article supplement (PMC3745543)
Supplement: NIHMS458428-supplement-1.pdf [file NIHMS458428-supplement-1.pdf]

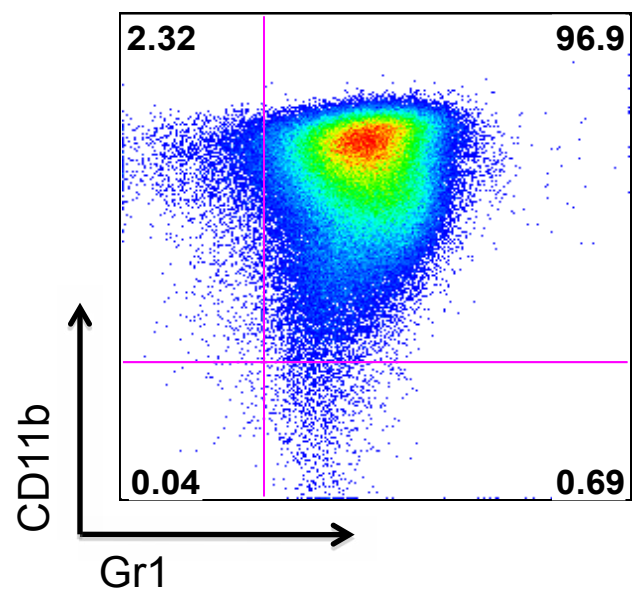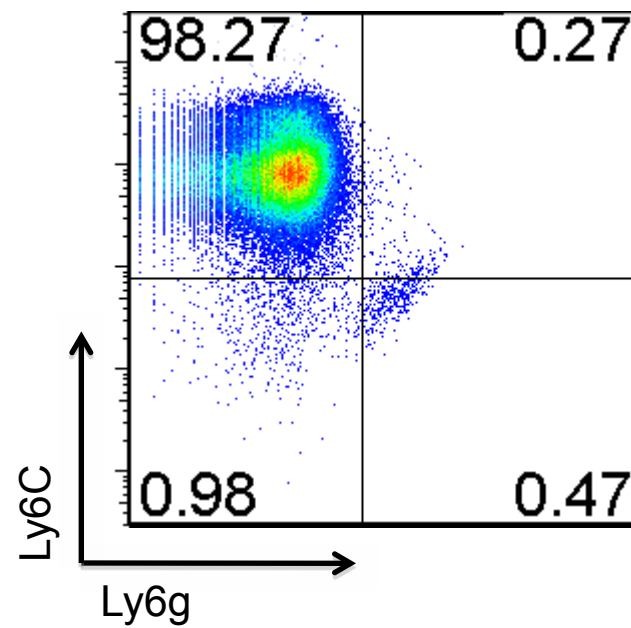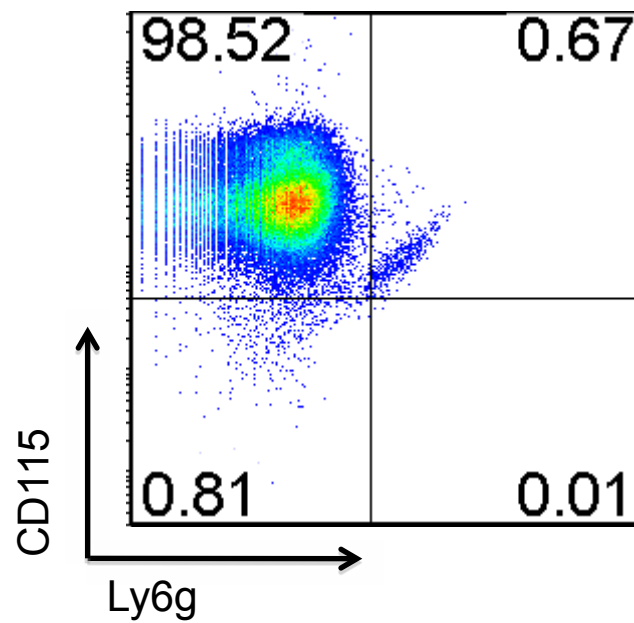

Supplemental Figure 1

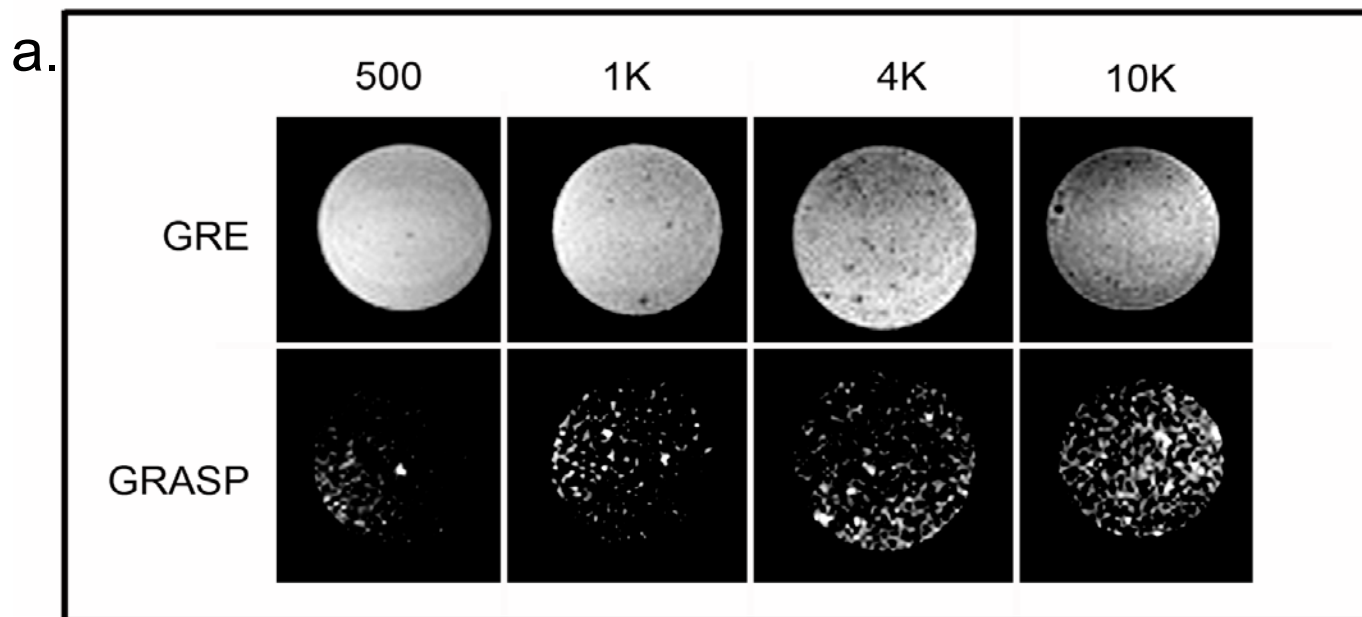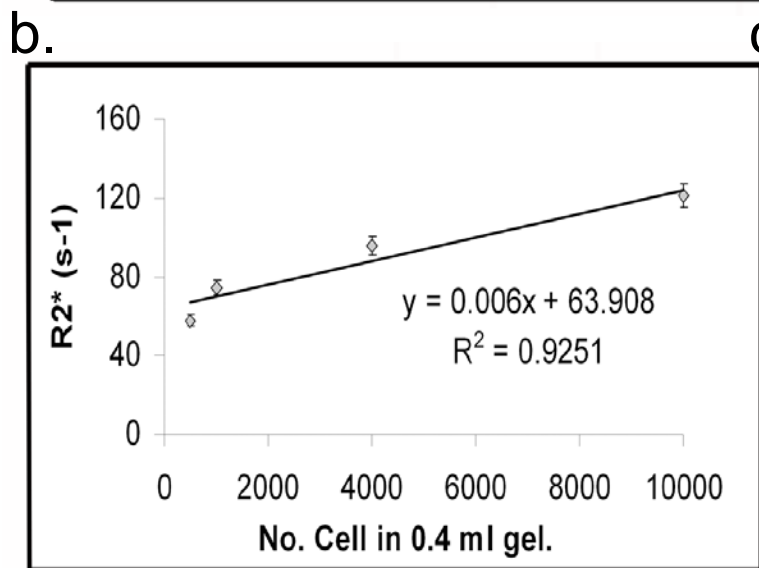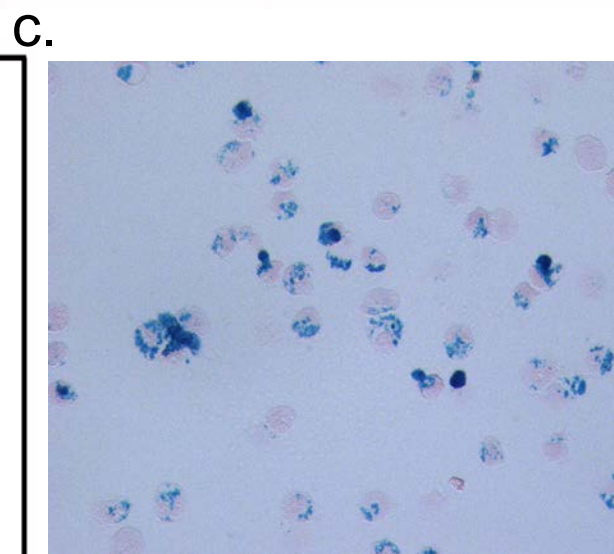

Supplementary Figure 2

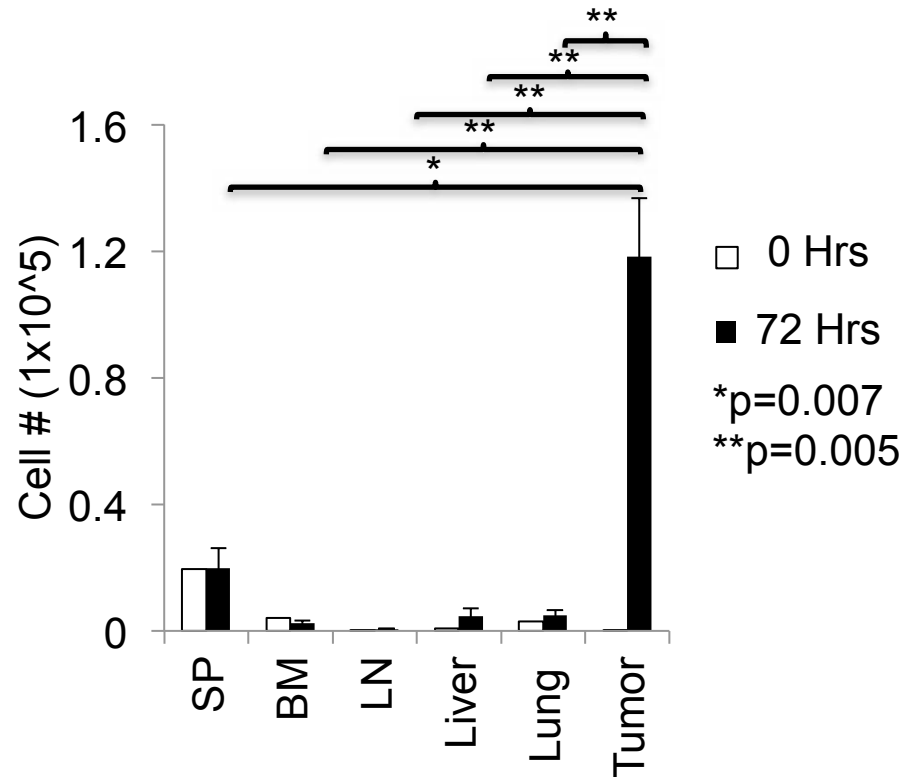

Supplemental Figure 3

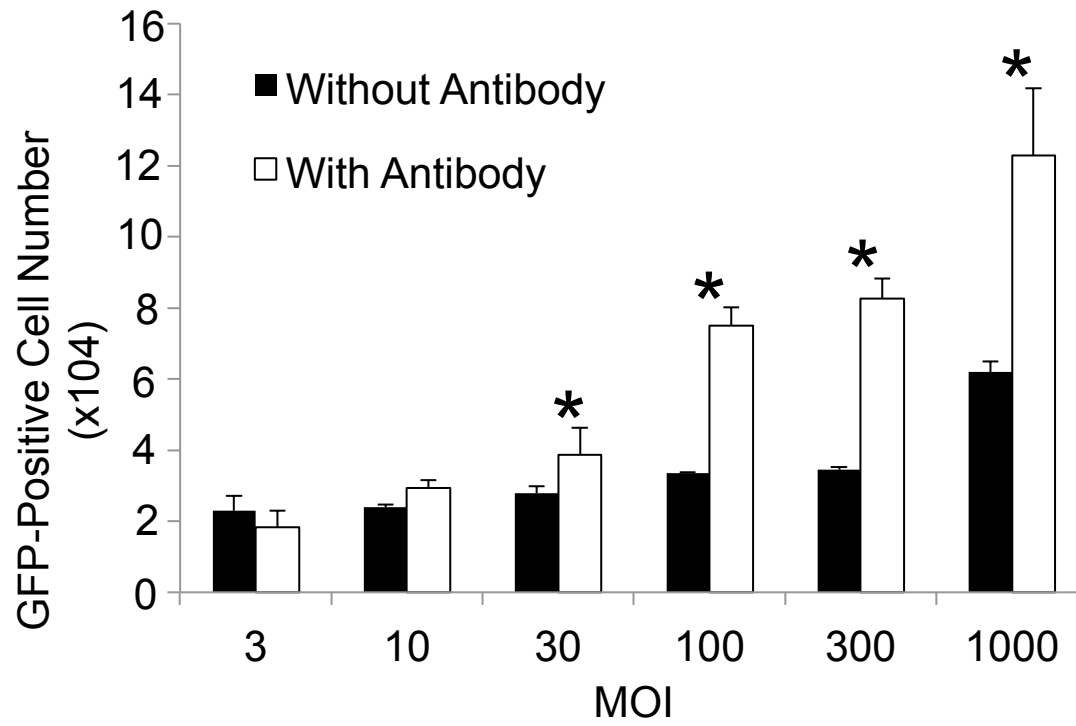

Supplemental Figure 4



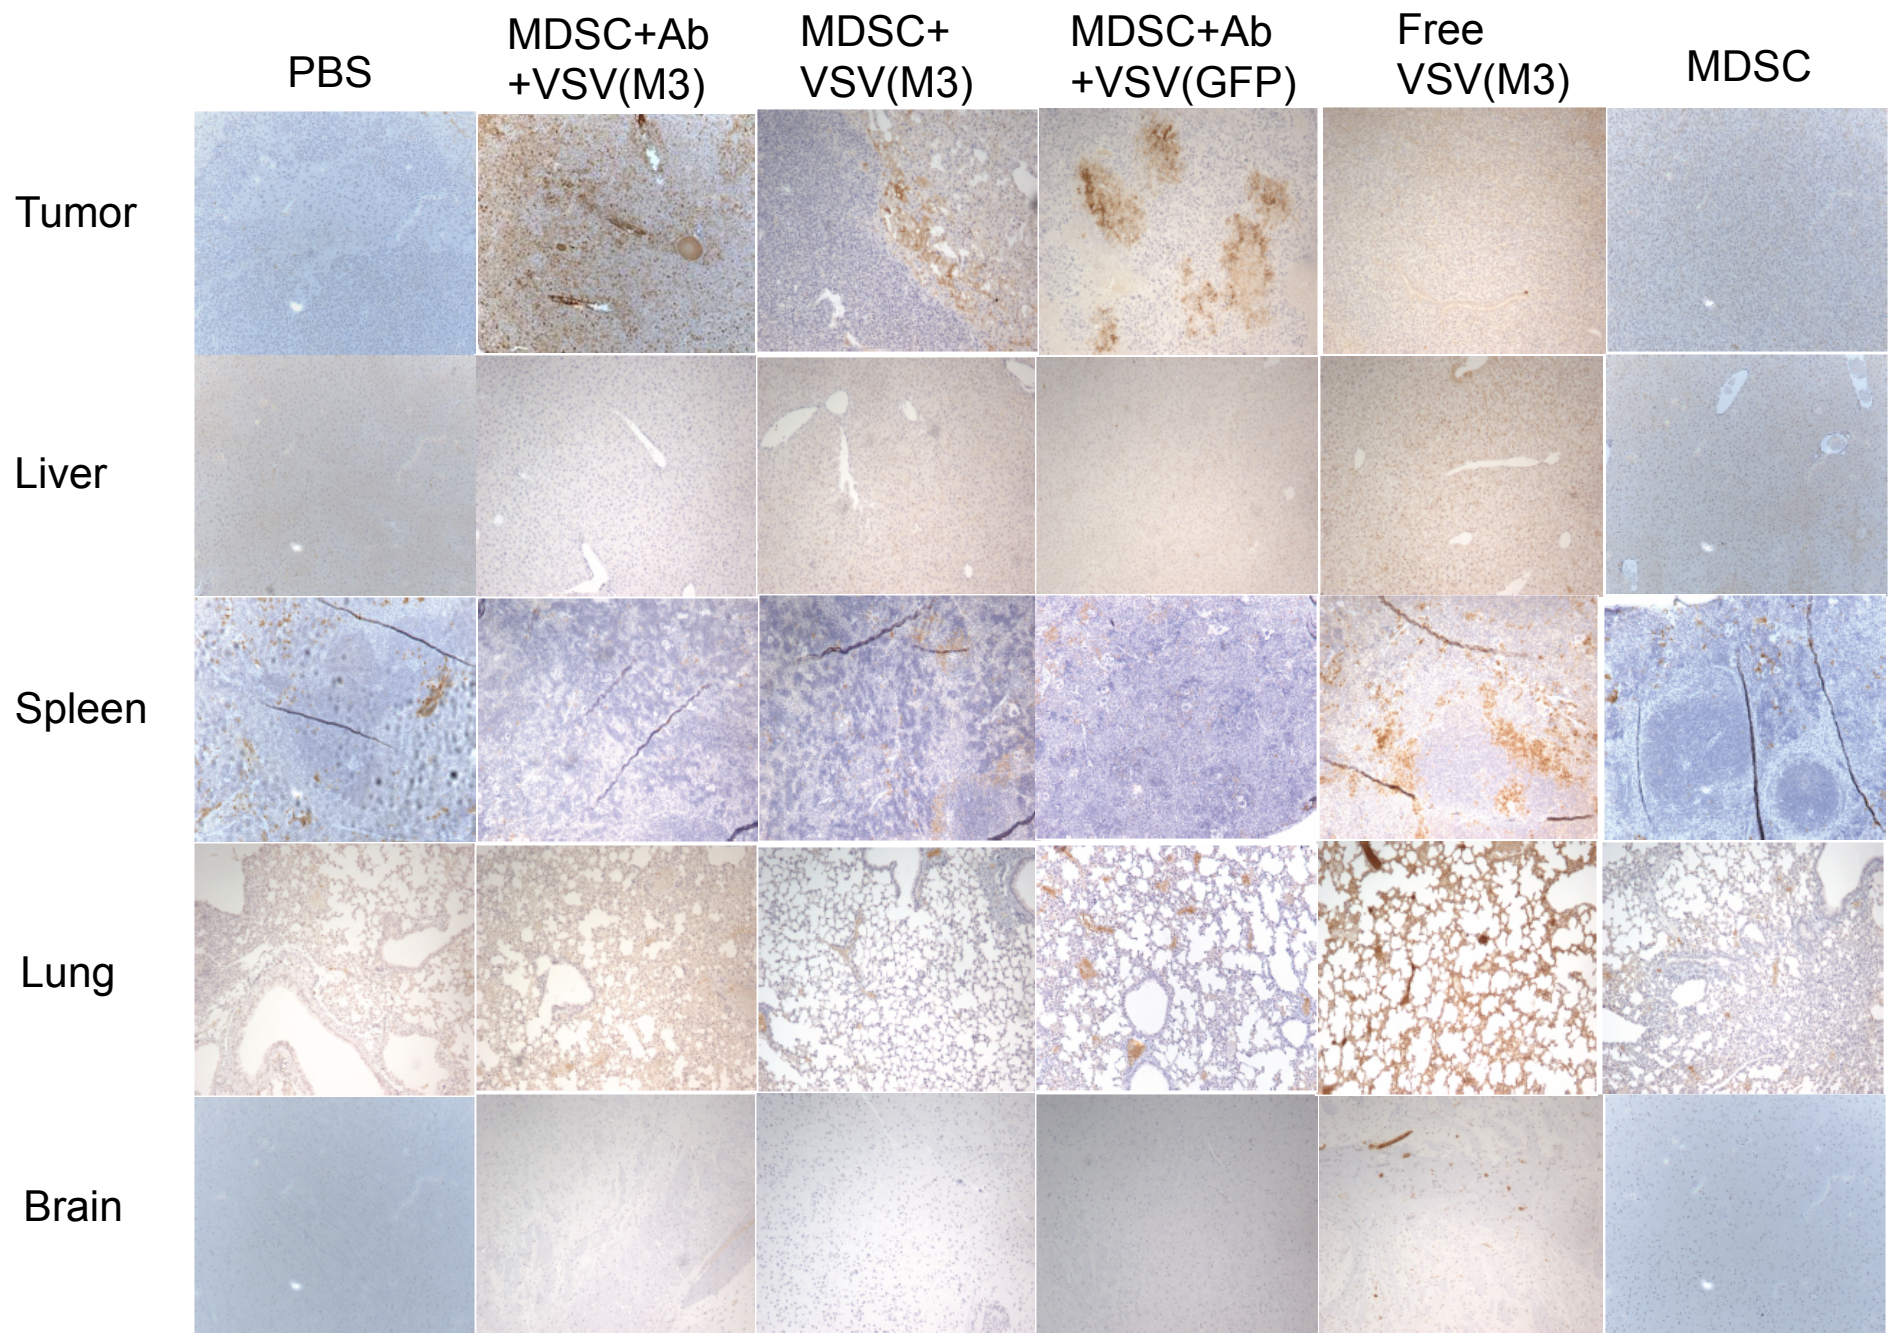

Supplemental Figure 5



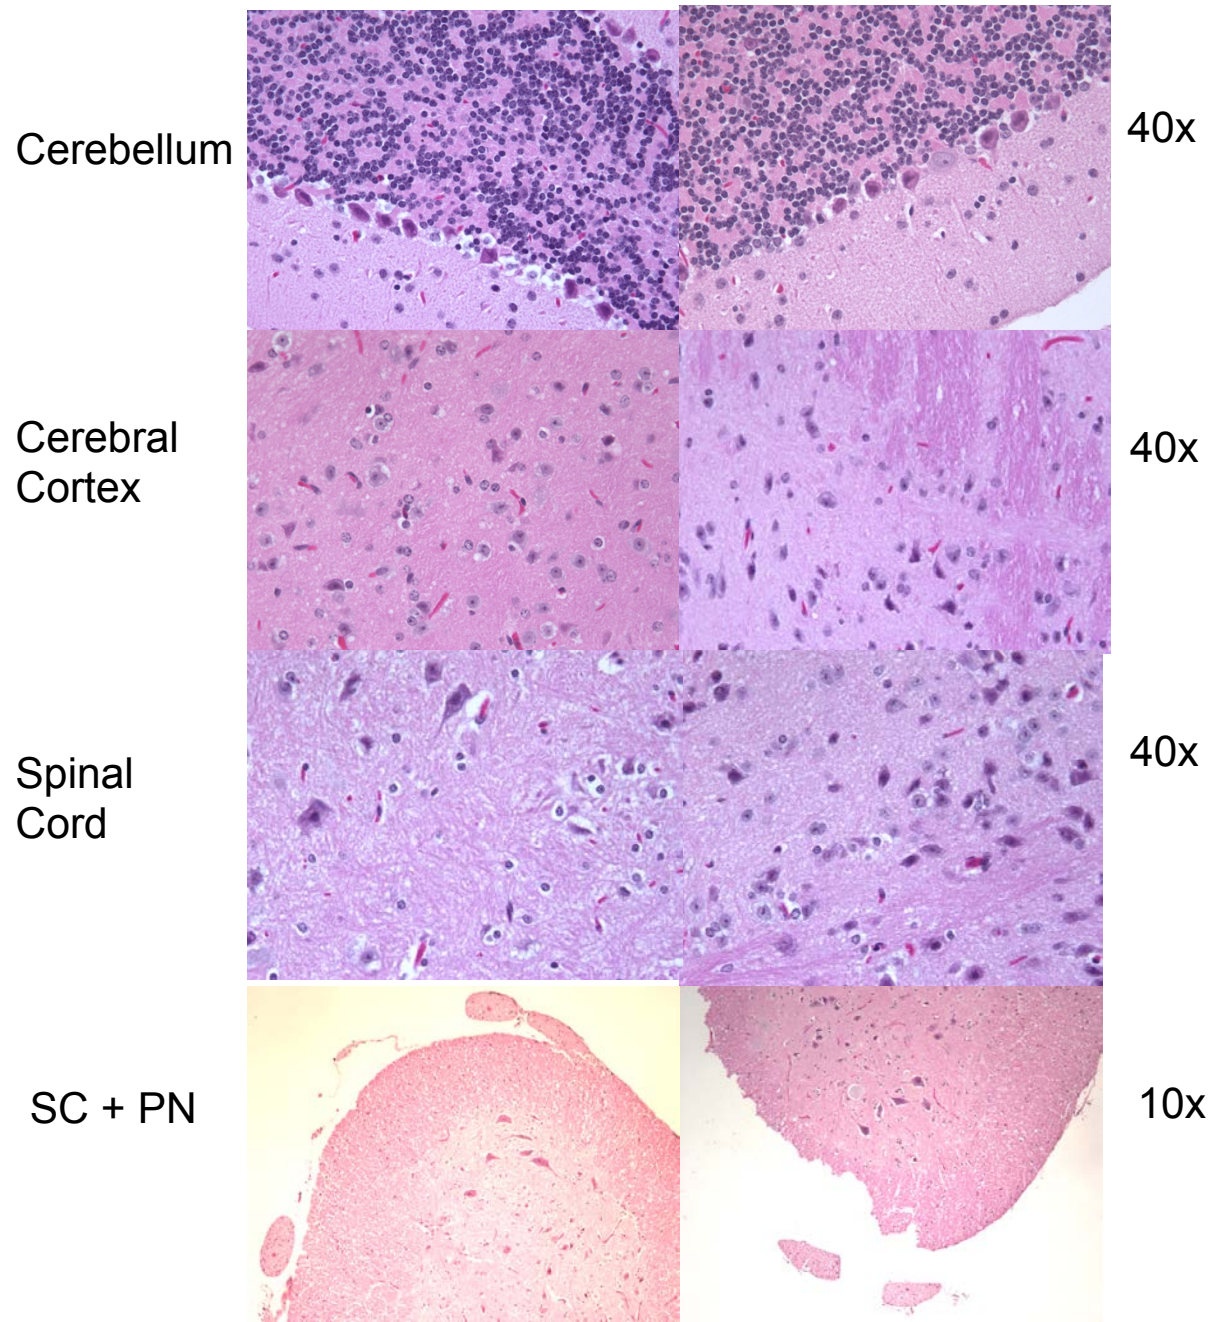

Supplemental Figure 6

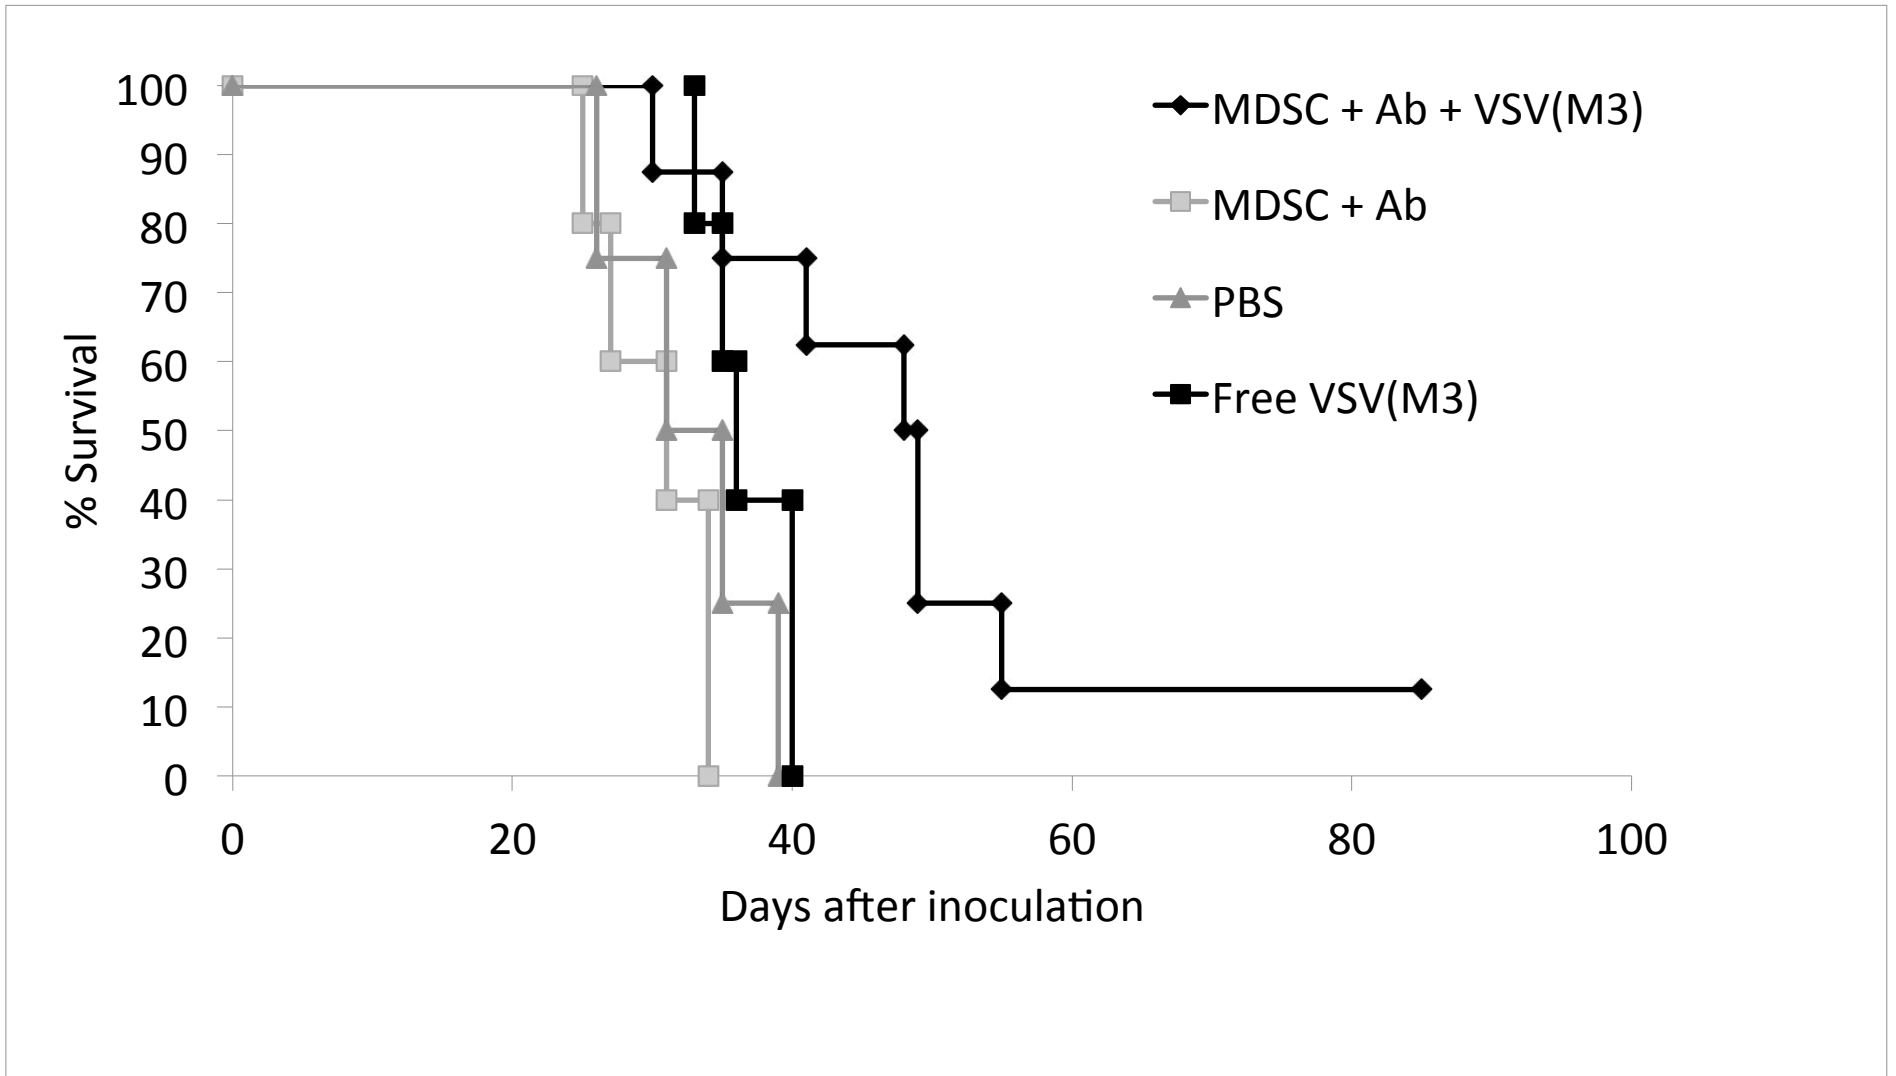

Supplemental Figure 7
